# Supplementary material
Source: Research Square preprint supplement (doi:10.21203/rs.3.rs-8929503/v1)
Supplement: Supplementary file 1 [file d5d246e748a955eaba2f6a3e.docx]

| **Deaths** | | | | | | |
| --- | --- | --- | --- | --- | --- | --- |
| **Year** | **Overall** | **Women** | **Men** | **Whites** | **Blacks** | **Population** |
| 1979 | 653 | 324 | 329 | 629 | 22 | 25133000 |
| 1980 | 1037 | 511 | 526 | 996 | 39 | 25549427 |
| 1981 | 1473 | 788 | 685 | 1420 | 49 | 26220797 |
| 1982 | 2260 | 1232 | 1028 | 2175 | 79 | 26787481 |
| 1983 | 4038 | 2197 | 1841 | 3881 | 136 | 27360673 |
| 1984 | 5846 | 3231 | 2615 | 5649 | 177 | 27877507 |
| 1985 | 7819 | 4496 | 3323 | 7513 | 277 | 28416179 |
| 1986 | 8982 | 5332 | 3650 | 8629 | 318 | 29007597 |
| 1987 | 10876 | 6548 | 4328 | 10400 | 438 | 29626166 |
| 1988 | 11841 | 7323 | 4518 | 11321 | 470 | 30123607 |
| 1989 | 12734 | 7951 | 4783 | 12105 | 585 | 30681756 |
| 1990 | 13390 | 8568 | 4822 | 12692 | 639 | 31078895 |
| 1991 | 13767 | 8855 | 4912 | 13088 | 630 | 31811624 |
| 1992 | 14136 | 9180 | 4956 | 13356 | 711 | 32355994 |
| 1993 | 16422 | 10748 | 5674 | 15530 | 794 | 32901811 |
| 1994 | 18217 | 12015 | 6202 | 17227 | 887 | 33330803 |
| 1995 | 20230 | 13393 | 6837 | 19063 | 1058 | 33769304 |
| 1996 | 21077 | 14242 | 6835 | 19905 | 1057 | 34143049 |
| 1997 | 22154 | 15269 | 6885 | 20897 | 1125 | 34401561 |
| 1998 | 22416 | 15503 | 6913 | 21081 | 1188 | 34619159 |
| 1999 | 44020 | 30883 | 13137 | 40380 | 2291 | 34797841 |
| 2000 | 48993 | 34805 | 14188 | 44760 | 2683 | 34991753 |
| 2001 | 53245 | 37754 | 15491 | 48482 | 3073 | 35290291 |
| 2002 | 58289 | 41565 | 16724 | 52981 | 3264 | 35522207 |
| 2003 | 62814 | 44760 | 18054 | 56707 | 3660 | 35863529 |
| 2004 | 65313 | 46635 | 18678 | 58585 | 4154 | 36203319 |
| 2005 | 70858 | 50622 | 20236 | 63323 | 4528 | 36649798 |
| 2006 | 71660 | 50874 | 20786 | 64020 | 4358 | 37164107 |
| 2007 | 73797 | 52374 | 21423 | 65733 | 4680 | 37825711 |
| 2008 | 81573 | 57445 | 24128 | 72486 | 4956 | 38777621 |
| 2009 | 78168 | 54652 | 23516 | 68993 | 4962 | 39623175 |
| 2010 | 82616 | 57621 | 24995 | 72757 | 5109 | 40267984 |
| 2011 | 84032 | 58772 | 25260 | 73674 | 5369 | 41394141 |
| 2012 | 82690 | 57455 | 25235 | 71983 | 5322 | 43145356 |
| 2013 | 83786 | 58366 | 25420 | 72426 | 5577 | 44704074 |
| 2014 | 92604 | 64639 | 27965 | 79270 | 6388 | 46243211 |
| 2015 | 109495 | 76270 | 33225 | 92493 | 7955 | 47760852 |
| 2016 | 114883 | 80028 | 34855 | 96799 | 8462 | 49244195 |
| 2017 | 120107 | 83350 | 36757 | 100850 | 8864 | 50858679 |
| 2018 | 120658 | 83299 | 37359 | 100644 | 8791 | 52431193 |
| 2019 | 120090 | 82709 | 37381 | 99427 | 9107 | 54058263 |
| 2020 | 132741 | 92101 | 40640 | 108169 | 10722 | 55659365 |
| 2021 | 117922 | 81536 | 36386 | 104274 | 9574 | 55847953 |
| 2022 | 118525 | 81707 | 36818 | 104949 | 9238 | 57794852 |
| 2023 | 112548 | 77112 | 35436 | 99637 | 8718 | 59248361 |
| **Total** | **2430795** | **1685040** | **745755** | **2131359** | **162484** | **1706564221** |

**Supplemental Table 1,** Alzheimer's Disease related mortalities in Older Adults, Stratified by Sex and Race, in the United States, 1979 to 2023.

| **Year Interval** | **APC/AAPC (95% CI)** |
| --- | --- |
| **Overall** | |
| 1979-1985 | APC 54.12 (38.46 – 71.57) |
| 1985-1997 | APC 5.35 (3.79 – 6.93) |
| 1997-2000 | APC 30.56 (11.95 – 52.25) |
| 2000-2008 | APC 3.69 (2.25 – 5.16) |
| 2008-2013 | APC -1.66 (-4.52 – 1.29) |
| 2013-2016 | APC 10.18 (1.32 – 19.83) |
| 2016-2023 | APC -1.14 (-2.17 – -0.11) |
| **Men** | |
| 1979-1985 | APC 51.04 (34.46 – 69.66) |
| 1985-1997 | APC 3.42 (1.49 – 5.32) |
| 1997-2000 | APC 27.87 (3.74 – 57.61) |
| 2000-2020 | APC 2.09 (1.71 – 2.47) |
| 2020-2023 | APC -4.83 (-9.66 – 0.25) |
| **Women** | |
| 1979-1985 | APC 57.20 (38.27 – 78.71) |
| 1985-1997 | APC 6.45 (4.70 – 8.24) |
| 1997-2000 | APC 30.61 (10.96 – 53.75) |
| 2000-2005 | APC 6.01 (2.23 – 9.94) |
| 2005-2013 | APC -0.03 (-1.38 – 1.34) |
| 2013-2016 | APC 9.82 (0.34 – 20.19) |
| 2016-2023 | APC -0.79 (-1.89 – 0.31) |
| **Whites** | |
| 1979-1985 | APC 54.15 (33.48 – 78.01) |
| 1985-1997 | APC 5.14 (3.02 – 7.31) |
| 1997-2000 | APC 32.89 (7.63 – 64.07) |
| 2000-2020 | APC 2.36 (1.97 – 2.76) |
| 2020-2023 | APC -4.43 (-9.55 – 0.98) |
| **Blacks** | |
| 1979-1987 | APC 39.64 (31.77 – 47.97) |
| 1987-1997 | APC 6.86 (5.15 – 8.60) |
| 1997-2000 | APC 33.40 (18.28 – 50.46) |
| 2000-2005 | APC 9.10 (6.38 – 11.90) |
| 2005-2013 | APC -0.13 (-1.04 – 0.78) |
| 2013-2016 | APC 10.39 (4.31 – 16.83) |
| 2016-2020 | APC 1.40 (-1.13 – 3.98) |
| 2020-2023 | APC -5.95 (-8.27 – -3.56) |
| **Northeast region** | |
| 1979-1986 | APC 38.15 (26.21 – 51.21) |
| 1986-1997 | APC 3.91 (1.63 – 6.24) |
| 1997-2000 | APC 35.18 (9.59 – 66.75) |
| 2000-2023 | APC 0.93 (0.63 – 1.23) |
| **South region** | |
| 1979-1985 | APC 59.91 (39.13 – 83.80) |
| 1985-1997 | APC 6.37 (4.50 – 8.26) |
| 1997-2000 | APC 26.91 (6.30 – 51.50) |
| 2000-2005 | APC 6.40 (2.27 – 10.69) |
| 2005-2013 | APC -0.92 (-2.37 – 0.55) |
| 2013-2016 | APC 12.50 (2.43 – 23.57) |
| 2016-2023 | APC -2.05 (-3.18 – -0.91) |
| **Midwest region** | |
| 1979-1986 | APC 43.51 (29.92 – 58.52) |
| 1986-1997 | APC 4.66 (2.43 – 6.94) |
| 1997-2000 | APC 32.19 (8.13 – 61.63) |
| 2000-2020 | APC 2.34 (1.96 – 2.72) |
| 2020-2013 | APC -3.42 (-8.60 – 2.05) |
| **West region** | |
| 1979-1985 | APC 50.18 (31.66 – 71.30) |
| 1985-1997 | APC 3.51 (1.48 – 5.59) |
| 1997-2000 | APC 37.20 (12.54 – 67.27) |
| 2000-2021 | APC 2.48 (2.17 – 2.79) |
| 2021-2013 | APC -7.28 (-15.26 – 1.46) |

**Supplemental Table 2,** Annual percent change (APC) and Average Annual Percentage Change (AAPC) of Alzheimer's Disease related Age-Adjusted Mortality Rates per 100,000, in Older Adults, in the United States, 1979 to 2023.

| **Age-Adjusted Rate (95% CI)** | | | |
| --- | --- | --- | --- |
| **Year** | **Men** | **Women** | **Overall** |
| **1979** | 3.58 (3.17 - 3.99) | 2.22 (1.97 - 2.46) | 2.72 (2.51 - 2.93) |
| **1980** | 5.51 (5.02 - 6.01) | 3.51 (3.20 - 3.81) | 4.3 (4.03 - 4.56) |
| **1981** | 7.29 (6.72 - 7.86) | 5.28 (4.91 - 5.65) | 6.07 (5.75 - 6.38) |
| **1982** | 10.99 (10.28 - 11.69) | 8.07 (7.62 - 8.53) | 9.19 (8.8 - 9.57) |
| **1983** | 19.98 (19.03 - 20.93) | 14.14 (13.54 - 14.73) | 16.31 (15.8 - 16.82) |
| **1984** | 28.63 (27.49 - 29.77) | 20.47 (19.76 - 21.18) | 23.47 (22.86 - 24.07) |
| **1985** | 36.19 (34.91 - 37.47) | 27.95 (27.13 - 28.77) | 31.03 (30.33 - 31.72) |
| **1986** | 39.44 (38.11 - 40.77) | 32.37 (31.50 - 33.24) | 35.03 (34.3 - 35.76) |
| **1987** | 46.57 (45.13 - 48.01) | 38.87 (37.92 - 39.81) | 41.79 (41 - 42.58) |
| **1988** | 48.32 (46.85 - 49.78) | 42.52 (41.55 - 43.50) | 44.72 (43.91 - 45.53) |
| **1989** | 50.46 (48.98 - 51.94) | 45.15 (44.16 - 46.15) | 47.28 (46.45 - 48.1) |
| **1990** | 50.92 (49.42 - 52.41) | 47.90 (46.88 - 48.91) | 49.19 (48.35 - 50.03) |
| **1991** | 50.30 (48.85 - 51.76) | 47.56 (46.57 - 48.55) | 48.73 (47.91 - 49.54) |
| **1992** | 49.58 (48.15 - 51.00) | 47.90 (46.92 - 48.88) | 48.77 (47.96 - 49.58) |
| **1993** | 55.52 (54.03 - 57.01) | 54.58 (53.54 - 55.61) | 55.29 (54.44 - 56.13) |
| **1994** | 59.58 (58.06 - 61.11) | 59.54 (58.47 - 60.61) | 59.84 (58.97 - 60.71) |
| **1995** | 63.93 (62.38 - 65.49) | 64.80 (63.70 - 65.90) | 64.86 (63.96 - 65.75) |
| **1996** | 62.37 (60.86 - 63.89) | 67.23 (66.12 - 68.34) | 65.93 (65.04 - 66.82) |
| **1997** | 61.28 (59.80 - 62.76) | 70.48 (69.36 - 71.60) | 67.73 (66.84 - 68.62) |
| **1998** | 60.24 (58.79 - 61.69) | 69.98 (68.87 - 71.08) | 67.02 (66.14 - 67.9) |
| **1999** | 112.14 (110.19 - 114.09) | 136.20 (134.68 - 137.73) | 128.82 (127.62 - 130.03) |
| **2000** | 119.11 (117.12 - 121.10) | 151.22 (149.63 - 152.82) | 141.23 (139.98 - 142.48) |
| **2001** | 127.67 (125.63 - 129.70) | 161.80 (160.16 - 163.44) | 150.96 (149.68 - 152.24) |
| **2002** | 135.48 (133.40 - 137.56) | 176.53 (174.83 - 178.23) | 163.24 (161.92 - 164.57) |
| **2003** | 142.81 (140.70 - 144.92) | 187.50 (185.76 - 189.25) | 172.95 (171.6 - 174.3) |
| **2004** | 145.18 (143.07 - 147.28) | 193.43 (191.66 - 195.19) | 177.38 (176.02 - 178.74) |
| **2005** | 152.66 (150.54 - 154.78) | 205.90 (204.09 - 207.70) | 188.15 (186.76 - 189.53) |
| **2006** | 152.11 (150.03 - 154.19) | 202.89 (201.11 - 204.66) | 185.8 (184.44 - 187.16) |
| **2007** | 152.41 (150.36 - 154.46) | 205.11 (203.34 - 206.88) | 186.89 (185.54 - 188.24) |
| **2008** | 166.84 (164.73 - 168.96) | 221.21 (219.39 - 223.04) | 202.3 (200.91 - 203.69) |
| **2009** | 158.41 (156.38 - 160.44) | 206.41 (204.66 - 208.16) | 189.68 (188.34 - 191.01) |
| **2010** | 164.75 (162.70 - 166.80) | 214.25 (212.48 - 216.02) | 196.93 (195.58 - 198.28) |
| **2011** | 159.84 (157.87 - 161.82) | 212.78 (211.03 - 214.53) | 193.95 (192.63 - 195.27) |
| **2012** | 154.98 (153.07 - 156.90) | 204.28 (202.58 - 205.98) | 186.45 (185.17 - 187.73) |
| **2013** | 150.95 (149.09 - 152.81) | 203.31 (201.63 - 204.99) | 184.4 (183.14 - 185.66) |
| **2014** | 161.12 (159.23 - 163.02) | 222.12 (220.38 - 223.87) | 199.63 (198.34 - 200.93) |
| **2015** | 186.11 (184.10 - 188.12) | 257.38 (255.52 - 259.24) | 230.97 (229.59 - 232.35) |
| **2016** | 190.33 (188.32 - 192.34) | 265.67 (263.80 - 267.54) | 237.62 (236.23 - 239) |
| **2017** | 194.72 (192.72 - 196.72) | 272.90 (271.02 - 274.78) | 243.49 (242.1 - 244.87) |
| **2018** | 191.88 (189.93 - 193.84) | 267.93 (266.09 - 269.77) | 239.15 (237.8 - 240.51) |
| **2019** | 186.71 (184.81 - 188.61) | 262.98 (261.17 - 264.79) | 233.77 (232.44 - 235.1) |
| **2020** | 198.10 (196.17 - 200.04) | 289.66 (287.77 - 291.55) | 254.26 (252.89 - 255.63) |
| **2021** | 188.25 (186.29 - 190.20) | 277.18 (275.27 - 279.09) | 242.43 (241.04 - 243.82) |
| **2022** | 179.87 (178.02 - 181.73) | 254.81 (253.05 - 256.56) | 225.96 (224.67 - 227.24) |
| **2023** | 169.45 (167.67 - 171.24) | 248.05 (246.30 - 249.81) | 216.95 (215.68 - 218.22) |
| **Total** | **107.83 (106.18 – 109.49)** | **139.38 (138.02 - 140.73)** | **128.06 (127.01 – 129.10)** |

**Supplemental Table 3,** Overall and Sex‐Stratified Alzheimer's Disease related Age-Adjusted Mortality Rates per 100,000, in Older Adults, in the United States, 1979 to 2023.

| **Age-Adjusted Rate (95% CI)** | | |
| --- | --- | --- |
| **Year** | **Whites** | **Blacks** |
| **1979** | 2.88 (2.65–3.11) | 1.12 (0.69–1.73) |
| **1980** | 4.53 (4.25–4.82) | 2.08 (1.46–2.88) |
| **1981** | 6.43 (6.09–6.77) | 2.61 (1.91–3.49) |
| **1982** | 9.72 (9.31–10.14) | 4.12 (3.24–5.17) |
| **1983** | 17.23 (16.68–17.78) | 7.01 (5.80–8.22) |
| **1984** | 24.94 (24.28–25.59) | 8.94 (7.60–10.28) |
| **1985** | 32.8 (32.06–33.55) | 13.70 (12.06–15.35) |
| **1986** | 37.03 (36.24–37.82) | 15.45 (13.73–17.18) |
| **1987** | 43.96 (43.11–44.82) | 21.32 (19.30–23.34) |
| **1988** | 47.07 (46.20–47.95) | 22.46 (20.40–24.51) |
| **1989** | 49.49 (48.60–50.37) | 27.66 (25.39–29.93) |
| **1990** | 51.32 (50.42–52.22) | 30.28 (27.91–32.66) |
| **1991** | 51 (50.13–51.88) | 28.77 (26.50–31.04) |
| **1992** | 50.78 (49.91–51.64) | 31.68 (29.33–34.02) |
| **1993** | 57.62 (56.71–58.53) | 34.83 (32.40–37.27) |
| **1994** | 62.42 (61.48–63.35) | 37.98 (35.47–40.49) |
| **1995** | 67.48 (66.52–68.44) | 44.18 (41.51–46.85) |
| **1996** | 68.8 (67.85–69.76) | 42.91 (40.32–45.51) |
| **1997** | 70.64 (69.68–71.60) | 44.88 (42.25–47.52) |
| **1998** | 69.77 (68.82–70.71) | 46.44 (43.80–49.09) |
| **1999** | 136.34 (135.01–137.67) | 89.24 (85.58–92.90) |
| **2000** | 149.22 (147.83–150.60) | 103.34 (99.42–107.25) |
| **2001** | 159.38 (157.96–160.80) | 118.24 (114.05–122.43) |
| **2002** | 172.36 (170.89–173.82) | 125.31 (121.00–129.62) |
| **2003** | 181.74 (180.25–183.24) | 139.20 (134.68–143.72) |
| **2004** | 185.7 (184.19–187.20) | 156.61 (151.84–161.39) |
| **2005** | 197.03 (195.49–198.57) | 166.01 (161.16–170.86) |
| **2006** | 195.07 (193.56–196.58) | 157.00 (152.33–161.67) |
| **2007** | 196.38 (194.87–197.89) | 164.24 (159.52–168.95) |
| **2008** | 213.01 (211.46–214.57) | 168.87 (164.16–173.57) |
| **2009** | 199.28 (197.79–200.78) | 164.41 (159.82–168.99) |
| **2010** | 207.19 (205.67–208.70) | 164.75 (160.22–169.28) |
| **2011** | 204.59 (203.10–206.08) | 167.48 (162.99–171.97) |
| **2012** | 196.64 (195.19–198.09) | 158.91 (154.63–163.19) |
| **2013** | 194.4 (192.97–195.83) | 160.95 (156.71–165.19) |
| **2014** | 210.1 (208.63–211.58) | 178.25 (173.86–182.64) |
| **2015** | 241.8 (240.23–243.37) | 213.84 (209.12–218.57) |
| **2016** | 249.67 (248.08–251.26) | 221.29 (216.55–226.02) |
| **2017** | 257.04 (255.45–258.64) | 223.62 (218.94–228.30) |
| **2018** | 252.25 (250.68–253.82) | 213.93 (209.44–218.43) |
| **2019** | 246.08 (244.54–247.62) | 214.56 (210.13–218.99) |
| **2020** | 265.54 (263.95–267.12) | 244.97 (240.31–249.63) |
| **2021** | 253.27 (251.72–254.81) | 224.44 (219.91–228.97) |
| **2022** | 236.45 (235.01–237.88) | 205.16 (200.94–209.37) |
| **2023** | 228.23 (226.81–229.65) | 192.23 (188.16–196.31) |
| **Total** | **134.55 (108.39 – 160.71)** | **106.78 (103.48 – 110.11)** |

**Supplemental Table 4**, Race‐Stratified Alzheimer's Disease related Age-Adjusted Mortality Rates per 100,000 in Older Adults, in the United States, 1979 to 2023.

| **Supplemental Table 5, Alzheimer's Disease related Age-Adjusted Mortality Rates per 100,000, Stratified by States, Older Adults, in the United States, 1979 to 2023** | | | |
| --- | --- | --- | --- |
| **State** | **AAMR (1979)** | **AAMR (2023)** | **% Change (1979–2023)** |
| Alabama | 3.12 | 291.43 | 9240.1 |
| Alaska | 14.01 | 211.02 | 1406.2 |
| Arizona | 6.03 | 204.44 | 3291.2 |
| Arkansas | 1.53 | 306.82 | 19956.2 |
| California | 3.9 | 277.05 | 6999.7 |
| Colorado | 3.15 | 240.2 | 7524.8 |
| Connecticut | 1.14 | 146.75 | 12774.6 |
| Delaware | - | 58.68 | - |
| District of Columbia | 3.06 | 125.01 | 1818.3 |
| Florida | 3.97 | 304.06 | 3048.6 |
| Georgia | 1.96 | 277.25 | 15411.2 |
| Hawaii | - | 191.73 | - |
| Idaho | 1.84 | 214.79 | 14966.8 |
| Illinois | 2.39 | 238.06 | 7922.6 |
| Indiana | 2.5 | 177.04 | 8491.6 |
| Iowa | 2.56 | 219.57 | 9196.1 |
| Kansas | 3.54 | 291.27 | 4900 |
| Kentucky | 2.86 | 197.85 | 7576.2 |
| Louisiana | 1.23 | 119.55 | 23573.2 |
| Maine | 6.41 | 141.18 | 2987.5 |
| Maryland | 1.51 | 251.15 | 7819.2 |
| Massachusetts | 7.01 | 250.24 | 1914.1 |
| Michigan | 1.8 | 387.94 | 13852.8 |
| Minnesota | 1.36 | 248.55 | 18300 |
| Mississippi | 0.54 | 173.44 | 71759.3 |
| Missouri | 2.01 | 231.8 | 12270.6 |
| Montana | 3.11 | 181.03 | 5477.8 |
| Nebraska | 3.43 | 200.76 | 6658 |
| Nevada | 2.33 | 145.54 | 7667 |
| New Hampshire | 4.89 | 178.24 | 3005.7 |
| New Jersey | 1.32 | 88.46 | 10928 |
| New Mexico | 1.86 | 253.91 | 9483.9 |
| New York | 2.33 | 265.9 | 3697 |
| North Carolina | 1.61 | 253.33 | 15678.3 |
| North Dakota | 2.96 | 251.87 | 8888.5 |
| Ohio | 3.73 | 282.84 | 6694.1 |
| Oklahoma | 1.93 | 163.76 | 12949.2 |
| Oregon | 1.78 | 242.24 | 15795.5 |
| Pennsylvania | 2.04 | 273.93 | 7925.5 |
| Rhode Island | 4.29 | 265.81 | 5546.9 |
| South Carolina | 3.37 | 261.83 | 8029.7 |
| South Dakota | 1.04 | 288.85 | 25462.5 |
| Tennessee | 0.57 | 315.74 | 45821.1 |
| Texas | 1.94 | 261.57 | 14786.1 |
| Utah | 3.83 | 176.19 | 8144.6 |
| Vermont | 5.64 | 297.98 | 4537.6 |
| Virginia | 1.87 | 195.07 | 9320.3 |
| Washington | 5.53 | 244.15 | 5287.5 |
| West Virginia | 0.72 | 195.07 | 26976.4 |
| Wisconsin | 3.41 | 244.15 | 7061.3 |
| Wyoming | - | 219.4 | **-** |

**Supplemental Table 5,** Alzheimer's Disease related Age-Adjusted Mortality Rates per 100,000, Stratified by States, in Older Adults, in the United States, 1979 to 2023.

|  | **Census Region: NorthEast** | **Census Region: Midwest** | **Census Region:  South** | **Census Region:  West** |
| --- | --- | --- | --- | --- |
| **Year** | **Age-Adjusted Rate (95% CI)** | **Age-Adjusted Rate (95% CI)** | **Age-Adjusted Rate (95% CI)** | **Age-Adjusted Rate (95% CI)** |
| **1979** | 2.85 (2.4 - 3.3) | 2.61 (2.21 - 3.01) | 2.21 (1.87–2.55) | 3.76 (3.15 - 4.37) |
| **1980** | 4.66 (4.1 - 5.23) | 4.31 (3.80 - 4.83) | 3.39 (2.97–3.81) | 5.54 (4.79 - 6.28) |
| **1981** | 5.89 (5.25 - 6.52) | 5.95 (5.35 - 6.55) | 5.12 (4.61–5.63) | 8.38 (7.48 - 9.28) |
| **1982** | 7.55 (6.84 - 8.26) | 9.52 (8.77 - 10.27) | 8.24 (7.6–8.88) | 12.79 (11.68 - 13.9) |
| **1983** | 13.24 (12.3 - 14.19) | 16.66 (15.67 - 17.66) | 14.99 (14.13–15.84) | 22.49 (21.04 - 23.95) |
| **1984** | 18.88 (17.76 - 20.01) | 22.74 (21.59 - 23.90) | 21.94 (20.91–22.97) | 33.74 (31.97 - 35.51) |
| **1985** | 25.11 (23.82 - 26.4) | 30.36 (29.03 - 31.68) | 30.53 (29.33–31.73) | 40.93 (39 - 42.86) |
| **1986** | 27.79 (26.44 - 29.14) | 36.37 (34.93 - 37.82) | 33.87 (32.62–35.12) | 44.78 (42.79 - 46.78) |
| **1987** | 33.75 (32.27 - 35.23) | 41.56 (40.02 - 43.09) | 42.67 (41.28–44.06) | 51.01 (48.91 - 53.11) |
| **1988** | 35.2 (33.7 - 36.7) | 46.96 (45.34 - 48.58) | 43.89 (42.5–45.28) | 55.19 (53.03 - 57.35) |
| **1989** | 36.13 (34.61 - 37.64) | 50.57 (48.90 - 52.24) | 48.48 (47.04–49.93) | 54.34 (52.22 - 56.46) |
| **1990** | 38.3 (36.74 - 39.85) | 51.93 (50.25 - 53.62) | 51.12 (49.65–52.6) | 55.23 (53.12 - 57.34) |
| **1991** | 36.98 (35.48 - 38.48) | 51.28 (49.64 - 52.93) | 51.48 (50.03–52.93) | 54.48 (52.43 - 56.53) |
| **1992** | 37.27 (35.78 - 38.76) | 52.92 (51.27 - 54.58) | 50.55 (49.14–51.96) | 53.64 (51.64 - 55.64) |
| **1993** | 41.62 (40.06 - 43.18) | 59.75 (58.01 - 61.49) | 59.34 (57.83–60.85) | 58.2 (56.16 - 60.25) |
| **1994** | 45.81 (44.19 - 47.43) | 63.15 (61.38 - 64.92) | 64.94 (63.39–66.5) | 62.59 (60.51 - 64.67) |
| **1995** | 49.77 (48.1 - 51.44) | 69.44 (67.60 - 71.29) | 70.26 (68.67–71.85) | 66.61 (64.5 - 68.72) |
| **1996** | 48.84 (47.2 - 50.47) | 68.36 (66.55 - 70.17) | 72.09 (70.5–73.68) | 71.5 (69.35 - 73.65) |
| **1997** | 51.07 (49.41 - 52.73) | 69.45 (67.64 - 71.26) | 74.71 (73.11–76.3) | 72.06 (69.94 - 74.18) |
| **1998** | 50 (48.37 - 51.62) | 69.03 (67.24 - 70.82) | 72.88 (71.31–74.44) | 73.25 (71.15 - 75.36) |
| **1999** | 96.15 (93.92 - 98.38) | 135.85 (133.36 - 138.34) | 131.72 (129.64–133.79) | 151.68 (148.7 - 154.66) |
| **2000** | 109.98 (107.61 - 112.34) | 149.72 (147.12 - 152.32) | 147.89 (145.7–150.07) | 153.82 (150.85 - 156.79) |
| **2001** | 117.08 (114.66 - 119.49) | 153.59 (150.98 - 156.21) | 161.52 (159.25–163.79) | 166.77 (163.72 - 169.82) |
| **2002** | 121.18 (118.73 - 123.62) | 167.15 (164.44 - 169.87) | 176.36 (174–178.73) | 182.08 (178.93 - 185.23) |
| **2003** | 123.59 (121.14 - 126.04) | 176.12 (173.35 - 178.89) | 185.5 (183.1–187.91) | 201.45 (198.17 - 204.72) |
| **2004** | 131.36 (128.85 - 133.87) | 178.02 (175.26 - 180.79) | 192.31 (189.88–194.74) | 200.85 (197.62 - 204.09) |
| **2005** | 133.97 (131.46 - 136.49) | 194.28 (191.41 - 197.15) | 204.64 (202.17–207.12) | 210.57 (207.31 - 213.83) |
| **2006** | 126.22 (123.8 - 128.64) | 192.17 (189.35 - 195.00) | 201.78 (199.35–204.21) | 214.01 (210.77 - 217.24) |
| **2007** | 130.51 (128.07 - 132.95) | 191.71 (188.91 - 194.51) | 201.75 (199.35–204.15) | 215.02 (211.83 - 218.22) |
| **2008** | 138.95 (136.45 - 141.45) | 214.70 (211.76 - 217.65) | 210.67 (208.24–213.09) | 238.85 (235.53 - 242.17) |
| **2009** | 131.3 (128.89 - 133.72) | 196.25 (193.45 - 199.04) | 198.27 (195.95–200.59) | 226.36 (223.17 - 229.55) |
| **2010** | 135.33 (132.89 - 137.77) | 204.98 (202.14 - 207.83) | 204.96 (202.62–207.3) | 235.87 (232.65 - 239.09) |
| **2011** | 131.98 (129.59 - 134.37) | 202.63 (199.83 - 205.43) | 199.19 (196.93–201.46) | 236.01 (232.85 - 239.17) |
| **2012** | 128.66 (126.32 - 131.01) | 195.93 (193.20 - 198.66) | 188.13 (185.96–190.3) | 228.92 (225.86 - 231.99) |
| **2013** | 121.67 (119.4 - 123.94) | 193.92 (191.22 - 196.62) | 187.84 (185.7–189.98) | 228.2 (225.18 - 231.22) |
| **2014** | 127.61 (125.3 - 129.92) | 204.56 (201.81 - 207.32) | 214.12 (211.87–216.37) | 237.7 (234.66 - 240.74) |
| **2015** | 144.39 (141.95 - 146.84) | 223.94 (221.08 - 226.81) | 257.9 (255.47–260.34) | 273.07 (269.86 - 276.28) |
| **2016** | 147.63 (145.17 - 150.08) | 240.66 (237.70 - 243.61) | 262.97 (260.54–265.4) | 273.74 (270.57 - 276.91) |
| **2017** | 152.44 (149.98 - 154.9) | 249.95 (246.96 - 252.93) | 265.54 (263.13–267.95) | 283 (279.8 - 286.2) |
| **2018** | 149.88 (147.46 - 152.3) | 246.83 (243.89 - 249.76) | 259.08 (256.74–261.43) | 277.9 (274.78 - 281.02) |
| **2019** | 146.43 (144.04 - 148.81) | 243.51 (240.61 - 246.40) | 249.68 (247.41–251.95) | 274.19 (271.13 - 277.25) |
| **2020** | 153.43 (151 - 155.86) | 265.75 (262.73 - 268.77) | 274.28 (271.93–276.63) | 296.89 (293.74 - 300.04) |
| **2021** | 148.67 (146.22 - 151.12) | 244.55 (241.54 - 247.55) | 261.15 (258.78–263.53) | 292 (288.75 - 295.24) |
| **2022** | 136.56 (134.28 - 138.84) | 234.77 (231.93 - 237.62) | 237.05 (234.88–239.22) | 275.83 (272.82 - 278.85) |
| **2023** | 135.8 (133.51 - 138.09) | 232.48 (229.62 - 235.34) | 224.59 (222.47–226.71) | 258.82 (255.88 - 261.76) |
| **Total** | **87.37 (71.25 - 103.48)** | **132.38 (105.96 - 158.79)** | **136.04 (108.35 - 163.72)** | **149.65 (119.29 - 180.01)** |

**Supplemental Table 6,** Alzheimer's Disease related Age-Adjusted Mortality Rates per 100,000, Stratified by Census Region, in Older Adults, in the United States, 1979 to 2023.

| **Category** | **Trend 1** | | **Trend 2** | | **Trend 3** | | **Trend 4** | | **Trend 5** | | **Trend 6** | | **Trend 7** | | **Trend 8** | |
| --- | --- | --- | --- | --- | --- | --- | --- | --- | --- | --- | --- | --- | --- | --- | --- | --- |
| **Year** | **APC (95% CI)** | **Year** | **APC (95% CI)** | **Year** | **APC (95% CI)** | **Year** | **APC (95% CI)** | **Year** | **APC (95% CI)** | **Year** | **APC (95% CI)** | **Year** | **APC (95% CI)** | **Year** | **APC (95% CI)** |
| Overall | 1979-1985 | 54.12* (38.46 to 71.56) | 1985-1997 | 5.35* (3.79 to 6.93) | 1997-2000 | 30.56* (11.95 to 52.25) | 2000-2008 | 3.69* (2.25 to 5.16) | 2008-2013 | -1.66 (-4.52 to 1.29) | 2013-2016 | 10.19* (1.32 to 19.83) | 2016-2023 | -1.14* (-2.17 to -0.11) | - | - |
| **Sex** | | | | | | | | | | | | | | | | | |
| Female | 1979-1985 | 57.20* (38.27 to 78.71) | 1985-1997 | 6.45* (4.70 to 8.24) | 1997-2000 | 30.61* (10.96 to 53.75) | 2000-2005 | 6.01* (2.23 to 9.94) | 2005-2013 | -0.03 (-1.38 to 1.34) | 2013-2016 | 9.82* (0.34 to 20.19) | 2016-2023 | -0.79 (-1.89 to 0.31) | - | - |
| Male | 1979-1985 | 51.04* (34.46 to 69.66) | 1985-1997 | 3.42* (1.49 to 5.39) | 1997-2000 | 27.87* (3.74 to 57.61) | 2000-2020 | 2.09* (1.71 to 2.47) | 2020-2023 | -4.83 (-9.66 to 0.25) | - | - | - | - | - | - |
| **Race** | | | | | | | | | | | | | | | | | |
| Black or African American | 1979-1987 | 39.64* (31.77 to 47.97) | 1987-1997 | 6.86* (5.15 to 8.60) | 1997-2000 | 33.40* (18.28 to 50.46) | 2000-2005 | 9.10* (6.38 to 11.90) | 2005-2013 | -0.13 (-1.04 to 0.78) | 2013-2016 | 10.39* (4.31 to 16.83) | 2016-2020 | 1.40 (-1.13 to 3.98) | 2020-2023 | -5.95* (-8.27 to -3.56) |
| White | 1979-1985 | 54.15* (33.48 to 78.01) | 1985-1997 | 5.14* (3.02 to 7.31) | 1997-2000 | 32.89* (7.63 to 64.08) | 2000-2020 | 2.36* (1.97 to 2.76) | 2020-2023 | -4.43 (-9.55 to 0.98) | - | - | - | - | - | - |
| **Census Region** | | | | | | | | | | | | | | | | | |
| Northeast | 1979-1986 | 38.15* (26.21 to 51.21) | 1986-1997 | 3.91* (1.63 to 6.24) | 1997-2000 | 35.18* (9.59 to 66.75) | 2000-2023 | 0.93* (0.63 to 1.23) | - | - | - | - | - | - | - | - |
| Midwest | 1979-1986 | 43.51* (29.92 to 58.52) | 1986-1997 | 4.66* (2.43 to 6.94) | 1997-2000 | 32.20* (8.13 to 61.63) | 2000-2020 | 2.34* (1.96 to 2.72) | 2020-2023 | -3.42 (-8.60 to 2.05) | - | - | - | - | - | - |
| South | 1979-1985 | 59.91* (39.13 to 83.80) | 1985-1997 | 6.37* (4.50 to 8.26) | 1997-2000 | 26.91* (6.30 to 51.50) | 2000-2005 | 6.40* (2.27 to 10.69) | 2005-2013 | -0.92 (-2.37 to 0.55) | 2013-2016 | 12.50* (2.43 to 23.57) | 2016-2023 | -2.05* (-3.18 to -0.91) | - | - |
| West | 1979-1985 | 50.18* (31.66 to 71.31) | 1985-1997 | 3.51* (1.48 to 5.59) | 1997-2000 | 37.20* (12.54 to 67.28) | 2000-2021 | 2.48* (2.17 to 2.79) | 2021-2023 | -7.28 (-15.26 to 1.46) | - | - | - | - | - | - |

**Table 1.** Alzheimer’s Disease APC by overall Population, Sex, Race and Region, U.S., 1979-2023.
